# Supplementary material
Source: PubMed Central journal article supplement (PMC5938108)

**SUPPLEMENTARY MATERIAL FOR ONLINE REPOSITORY****TEXT:****METHODS**Study Design and Population

This study was approved by the Vanderbilt University Institutional Review Board. Patients presented to the Vanderbilt Asthma, Sinus, and Allergy Program (ASAP) and Otolaryngology clinic at the Vanderbilt Bill Wilkerson Center. CRS was diagnosed according to the European Position Paper on Rhinosinusitis and Nasal Polyps and the International Consensus Statement on Allergy and Rhinology and therefore were initially managed medically<sup>1,2</sup>. Patients with continued symptoms who elected to undergo endoscopic sinus surgery were prospectively enrolled. Only patients with diffuse, bilateral inflammatory CRS were included, and patients with odontogenic rhinosinusitis, fungus balls, and isolated osteomeatal complex obstruction were excluded. Control cases included patients undergoing pituitary or skull base surgery without a clinical or radiographic history of CRS. Patients were excluded if they had received systemic steroids within 4 weeks of surgery. Patients with cystic fibrosis, autoimmune, or granulomatous diseases or who were receiving immune-directed monoclonal antibodies were excluded. The presence of concomitant allergic rhinitis and asthma was recorded. Allergic rhinitis was diagnosed based on positive skin prick testing and/or prior physician diagnosis and clinical history suggestive of seasonal variation of atopic symptoms with improvement following use of topical nasal steroid or oral antihistamines. Asthma was diagnosed based on a positive methacholine challenge or consistent pulmonary function studies, or by prior diagnosis by a pulmonologist. Patient reported symptom severity was measured utilizing the Sinonasal Outcome Test-22 (SNOT-22)<sup>3</sup>. All patients underwent a high resolution CT scan of the paranasal sinuses within 3 months of surgery. Each scan was evaluated by two physicians who were blinded to subject identifiers and diagnosis. A standard Lund Mackay scoring system was used to assess overall extent of CRS. Subjects enrolled in the study also completed the 40-

item Smell Identification Test (SIT) immediately prior to surgery. The SIT has excellent sensitivity, correlates closely with scores attained via formal threshold testing, and has the advantage of being easily and quickly administered to subjects on the day of surgical intervention<sup>4</sup>. Raw scores were adjusted for patient age and gender by subtracting the mean normative age- and sex-appropriate SIT score from the total SIT score for each subject<sup>5</sup>. Thus a negative adjusted SIT score represents reduced sense of smell compared to the mean for that subject's age and gender. Normative SIT scores were extracted from the Smell Identification Test Administration Manual (Sensonics International; Haddon Heights, NJ).

#### Mucus Collection and Histopathologic Evaluation of Sinonasal Tissue

At the beginning of surgery, 9 x 24mm polyurethane sponges (Summit Medical; St. Paul, MN) were placed bilaterally into the middle meatus or ethmoid cavity of each subject under endoscopic guidance as previously reported<sup>6</sup>. This approach has been previously validated, and has advantages over other methods for mucus collection, including standardization between subjects and avoidance of specimen dilution<sup>7-9</sup>. Each sponge was removed after 5 minutes, placed in a sterile microcentrifuge tube and immediately processed. Sponges were placed into a microporous centrifugal filter device (MilliporeSigma; Billerica, MA) and centrifuged at 14,000 x g for 10 minutes to elute mucus. Samples were then combined, gently vortexed, and again centrifuged for 5 minutes to remove any cellular debris. Supernatants were removed, placed into a new microcentrifuge tube, and frozen at -80°C for later analysis.

Cytokine assays were performed using a multiplex cytokine bead assay (BD Biosciences; Franklin Lakes, NJ) according to the manufacturer's protocol. Briefly, 50 µL of mucus was incubated with 50 µL of mixed capture beads for each measured inflammatory mediator and incubated for 1 hour. 50 µL of mixed detection reagent was then added to each sample and standard, and incubated for an additional 2 hours. After addition of 1 mL wash buffer, samples were centrifuged at 200 x g for 5 minutes and the supernatant was discarded. The beads were then resuspended in 300 µL wash buffer and analyzed

on an LSR Fortessa flow cytometer (BD Biosciences; San Jose, CA). Data was analyzed using BD FACS Array Software version 3.0.

Sinonasal tissue was collected from the ethmoid bulla or posterior ethmoid sinus in all patients undergoing endoscopic sinus surgery for CRS. Tissue from healthy controls was collected from either the ethmoid sinus or sphenoethmoid recess. Histopathological evaluation of excised tissue was performed by a pathologist in a blinded fashion and the mean number of eosinophils counted over 5 randomly selected high powered fields (HPF) was recorded.

## Statistics

Sample size for principal component analysis and subsequent clustering was estimated by establishing a subject to variable ratio of 5:1 (90 subjects, 18 biological variables) as recommended by Gorsuch and Hatcher<sup>10, 11</sup>. Adequacy of the sample size was verified *post hoc* by assessing variable communality (heavy loading of variables in retained components). Descriptive statistics and frequency distributions were examined for each biological variable and all were positively skewed. In order to normalize data for subsequent analysis, values were transformed by taking the natural logarithm, resulting in elimination or significant reduction of skewing for all variables. A principal component factor analysis with varimax rotation was then performed on the transformed biological variables. Variables with a loading > 0.5 were retained. The appropriate number of factors was selected by analysis of the Scree plot, with a requirement that retained factors explain at least 70% of data variance, and that each factor have an eigenvalue > 1.0. The regression method was then used to calculate a factor score for each subject in each of the five factors. Hierarchical cluster analysis was performed using Ward's method on squared Euclidian distances using the five factor scores. The hierarchical structure of the data was visualized using a dendrogram. The appropriate number of clusters was selected by calculating within and between class variance for models that included between 2 and 15 clusters, with a goal of minimizing within class variance and maximizing between class variance. This was also verified by identifying the bend on the accompanying Scree plot.

Clusters were then retrospectively compared against the individual components used for analysis, and then against the individual biological variables themselves. Subsequently, clusters were compared against demographic and clinical data. For comparison between groups, normality of data was assessed using the D'Agostino-Pearson omnibus test. Variables with a normal distribution were compared using a student's t-test or analysis of variance, while nonparametric data was analyzed using the Mann-Whitney test or Kruskal-Wallis test followed by Dunn's test for multiple comparisons. Comparative data was presented as means +/- standard deviation or medians with interquartile range, respectively. A p value of 0.05 was considered statistically significant for all comparisons. Statistical analyses were performed with Prism 6 software (Graphpad; La Jolla, CA), and principal component and hierarchical cluster analysis were performed using SAS (SAS Institute Inc.; Cary, NC) and XLSTAT (Addinsoft; New York, NY.).

## TABLES:

**Table E1. Study population and demographics for healthy control and CRS patients.** Data is presented as frequencies (percentages), means +/- standard deviation or medians with interquartile range. AERD, aspirin-exacerbated respiratory disease; AFRS, allergic fungal rhinosinusitis; BMI, body mass index; CT, computed tomography; NCS, nasal corticosteroid; LTR, anti-leukotriene; SIT, smell identification test; SNOT-22, sinonasal outcome test-22.

**Table E2. Loading of biological variables after principal component analysis.** Values for all biological variables were transformed to achieve normalcy and then analyzed with principal component analysis with varimax rotation. Variables with a loading > 0.5 were retained. Data for the first five factors are shown based on analysis of the plotted Eigenvalues for each component. The 5-factor solution explained 71.3% of the collective data variance.

**Table E3. Differences in mucus cytokines levels between the 6 identified CRS endotypes.** Median cytokine levels of control subjects and each of the 6 CRS clusters are shown for all 18 assayed biological variables. Significant differences among CRS endotypes and between each CRS endotype and the control group were identified using the Kruskal-Wallis test. Differences among the endotypes are represented by the listed p-values, with a p-value < 0.05 considered statistically significant. Post hoc analysis of differences between each cluster and healthy controls were then performed. Clusters with a higher (\*) or lower (¥) median cytokine level compared to controls are annotated. Data is represented as medians with interquartile range. **BOLD**, p < 0.05.

**FIGURES:**

**Figure E1. Validation of the number of principal components and clusters.** (A) Eigenvalues for calculated factors in a Scree plot. The optimum number of factors was estimated by identifying an approximate break point on the plotted curve and by eliminating factors with an eigenvalue of less than 1. (B) The ideal number of CRS clusters was determined by comparing within and between class variance for models that included between 2 and 15 clusters, with a goal of minimizing within class and maximizing between class variance.

**Figure E2. Postoperative improvement in sinonasal quality of life among high- and low-inflammation clusters.** (A) Clusters were combined by defining a higher ‘cut point’ on the dendrogram. This corresponded to high- and low-inflammation clusters with distinct pathophysiology, as defined in Figure 3. Subjects in Clusters 3-6 were more likely to have had prior endoscopic sinus surgery than subjects in Clusters 1 and 2 (75.8% vs. 37.8%;  $p < 0.001$ ) (B) and had a greater number of prior procedures (median 1.0 vs. 0.0,  $p < 0.0001$ ) (C). Postoperative sinonasal quality of life, as assessed by the SNOT-22 questionnaire, was plotted for all subjects with postoperative follow-up of at least 6 months (D,E). Comparison of total (F) and % improvement (G) in SNOT-22 scores were then compared between each group. No significant difference in overall SNOT-22 improvement was identified between groups ( $p = 0.12$ ), however Clusters 3-6 had a greater % improvement, compared to Clusters 1 and 2 ( $p = 0.04$ ). Data for SNOT-22 and frequency of prior sinus surgery are presented as box-whisker plots with the median and range for each group.

## REFERENCES:

1. Fokkens WJ, Lund VJ, Mullol J, Bachert C, Alobid I, Baroody F, et al. European Position Paper on Rhinosinusitis and Nasal Polyps 2012. *Rhinol Suppl* 2012; 23:3 p preceding table of contents, 1-298.
2. Orlandi RR, Kingdom TT, Hwang PH, Smith TL, Alt JA, Baroody FM, et al. International Consensus Statement on Allergy and Rhinology: Rhinosinusitis. *Int Forum Allergy Rhinol* 2016; 6 Suppl 1:S22-209.
3. Hopkins C, Gillett S, Slack R, Lund VJ, Browne JP. Psychometric validity of the 22-item Sinonasal Outcome Test. *Clin Otolaryngol* 2009; 34:447-54.
4. Doty RL, Shaman P, Kimmelman CP, Dann MS. University of Pennsylvania Smell Identification Test: a rapid quantitative olfactory function test for the clinic. *Laryngoscope* 1984; 94:176-8.
5. Hauser LJ, Chandra RK, Li P, Turner JH. Role of tissue eosinophils in chronic rhinosinusitis-associated olfactory loss. *Int Forum Allergy Rhinol* 2017; 7:957-62.
6. Wu J, Chandra, R.K., Li, P., Hull, B.P., Turner, J.H. Olfactory cleft cytokine levels correlate with olfaction in chronic rhinosinusitis with nasal polyps. *Laryngoscope* 2017; In press.
7. Konig K, Klemens C, Eder K, San Nicolo M, Becker S, Kramer MF, et al. Cytokine profiles in nasal fluid of patients with seasonal or persistent allergic rhinitis. *Allergy Asthma Clin Immunol* 2015; 11:26.
8. Scavuzzo MC, Rocchi V, Fattori B, Ambrogi F, Carpi A, Ruffoli R, et al. Cytokine secretion in nasal mucus of normal subjects and patients with allergic rhinitis. *Biomed Pharmacother* 2003; 57:366-71.
9. Oyer SL, Mulligan JK, Psaltis AJ, Henriquez OA, Schlosser RJ. Cytokine correlation between sinus tissue and nasal secretions among chronic rhinosinusitis and controls. *Laryngoscope* 2013; 123:E72-8.
10. Gorsuch RL. Factor analysis. 2nd Edition ed. Hillsdale: L. Erlbaum Associates; 1983.
11. O'Rourke N, Hatcher, L. A step-by-step approach to using the SAS system for factor analysis and structural equation modeling. Second edition ed. Cary, NC: SAS Institute, Inc.; 2013.

**Table E1.**

|                            | Healthy Control | CRS              |
|----------------------------|-----------------|------------------|
| No.                        | 17              | 90               |
| Age (years)                | 50.5 +/- 13.1   | 48.5 +/- 13.1    |
| Sex, no. (% female)        | 13 (76)         | 42 (47)          |
| Race, no. (% white)        | 13 (76)         | 80 (89)          |
| Current smoker, no. (%)    | 1 (6)           | 6 (7)            |
| BMI (kg/m <sup>2</sup> )   | 30.5 +/- 7.0    | 29.7 +/- 6.2     |
| Nasal polyps, no. (%)      | 0 (0)           | 53 (59)          |
| Asthma, no. (%)            | 0 (0)           | 42 (47)          |
| Allergic Rhinitis, no. (%) | 1 (6)           | 56 (62)          |
| AERD, no. (%)              | 0 (0)           | 12 (13)          |
| AFRS, no. (%)              | 0 (0)           | 10 (11)          |
| Taking NCS, no. (%)        | 1 (6)           | 71 (79)          |
| Taking LTR, no. (%)        | 0 (0)           | 25 (28)          |
| SNOT-22 score              | -               | 47.1 +/- 18.7    |
| CT score                   | 1.0 (0.0-3.6)   | 16.0 (11.0-20.0) |
| SIT score                  | -4.0(-7.0--1.0) | -7.0(-24.5--3.0) |
| Prior surgery, no. (%)     | 0 (0)           | 43 (48)          |

**Table E2.**

| Variable      | Rotated Factor |       |       |       |       |
|---------------|----------------|-------|-------|-------|-------|
|               | 1              | 2     | 3     | 4     | 5     |
| IL-1 $\beta$  | 0.883          |       |       |       |       |
| IL-8          | 0.833          |       |       |       |       |
| IL-6          | 0.718          |       |       |       |       |
| TNF- $\alpha$ | 0.631          |       |       |       |       |
| Eotaxin       | 0.604          |       |       |       |       |
| IL-7          |                |       |       |       |       |
| IL-5          |                | 0.943 |       |       |       |
| IL-13         |                | 0.912 |       |       |       |
| IL-9          |                | 0.655 |       |       |       |
| IL-2          |                |       | 0.76  |       |       |
| IL-21         |                |       | 0.681 |       |       |
| IL-4          |                |       | 0.553 |       |       |
| IL-12         |                |       | 0.551 |       |       |
| IFN- $\gamma$ |                |       |       | 0.926 |       |
| IL-10         |                |       |       | 0.894 |       |
| IL-3          |                |       |       |       | 0.823 |
| IL-17         |                |       |       |       | 0.505 |
| RANTES        |                |       |       |       | 0.504 |

**Table E3.**

|               | Control          | Cluster 1         | Cluster 2      | Cluster 3              | Cluster 4          | Cluster 5            | Cluster 6            | p-value |
|---------------|------------------|-------------------|----------------|------------------------|--------------------|----------------------|----------------------|---------|
| No.           | 17               | 31                | 24             | 6                      | 7                  | 13                   | 7                    |         |
| IL-1 $\beta$  | 42.1(13.3-211.7) | 101.9(27.6-289.8) | 7.1(1.5-12.5)¥ | 323.8(80.2-1491.0)     | 24.9(15.8-139.1)   | 549.1(171.6-6211.0)* | 521.6(287.3-2845.0)  | <0.0001 |
| IL-2          | 0.0(0.0-11.1)    | 2.9(0.0-12.8)     | 0.0(0.0-1.6)   | 19.9(4.0-36.1)         | 17.8(11.3-46.9)*   | 0.0(0.0-7.1)         | 8.8(2.1-68.1)        | 0.0001  |
| IL-3          | 0.0(0.0-0.0)     | 0.0(0.0-0.0)      | 0.0(0.0-0.0)   | 0.4(0.0-1.2)           | 1.7(1.4-13.0)*     | 0.0(0.0-0.0)         | 0.0(0.0-0.1)         | <0.0001 |
| IL-4          | 0.08(0.0-1.30)   | 0.0(0.0-1.4)      | 0.0(0.0-0.0)   | 2.5(0.9-3.1)           | 4.2(1.4-4.4)*      | 0.1(0.0-2.3)         | 4.0(1.9-5.2)*        | <0.0001 |
| IL-5          | 0.12(0.01-0.77)  | 3.2(0.1-27.4)*    | 9.3(1.6-60.8)* | 507.1(325.4-1843.0)*   | 160.6(40.0-240.5)* | 1.2(0.1-10.4)        | 9.0(2.5-18.6)*       | <0.0001 |
| IL-6          | 59.8(13.4-190.3) | 116.3(41.0-285.9) | 9.8(4.4-48.0)  | 1701.0(1116.0-5092.0)* | 205.8(42.6-659.7)  | 119.9(47.6-1138.0)   | 733.7(265.5-1076.0)* | <0.0001 |
| IL-7          | 3.7(1.6-9.8)     | 5.4(1.6-11.3)     | 1.7(0.4-3.0)   | 14.8(12.7-18.9)        | 9.2(2.9-19.9)      | 7.4(2.2-20.5)        | 23.7(12.6-47.6)*     | <0.0001 |
| IL-8          | 3067(1610-9078)  | 5461(2838-9885)   | 1337(861-2428) | 7838(3546-132655)      | 3264(1543-15683)   | 12840(4757-38650)    | 13001(10322-335288)* | <0.0001 |
| IL-9          | 0.0(0.0-1.6)     | 0.0(0.0-0.0)      | 0.0(0.0-0.0)   | 23.2(8.6-64.6)*        | 16.6(0.9-63.4)*    | 0.1(0.0-3.1)         | 4.0(1.1-16.9)        | <0.0001 |
| IL-10         | 2.6(0.1-6.3)     | 4.0(0.9-8.2)      | 0.8(0.0-3.1)   | 27.1(15.0-63.2)*       | 10.6(6.9-17.5)     | 1.2(0.0-15.6)        | 9.9(6.6-23.3)        | <0.0001 |
| IL-12         | 43.5(20.3-117.7) | 72.3(12.4-113.5)  | 3.4(0.0-4.9)¥  | 112.7(10.4-325.7)      | 52.2(20.2-87.2)    | 45.2(2.8-121.2)      | 355.6(188.7-681.0)*  | <0.0001 |
| IL-13         | 1.6(0.0-6.7)     | 3.0(0.0-22.0)     | 7.7(0.0-37.5)  | 468.6(346.4-712.9)*    | 86.6(36.8-358.8)*  | 2.9(0.6-7.8)         | 52.4(24.6-93.5)*     | <0.0001 |
| IL-17A        | 0.0(0.0-0.0)     | 0.0(0.0-0.8)      | 0.0(0.0-0.2)   | 4.0(3.2-8.3)*          | 9.2(4.9-14.5)*     | 2.1(0.0-8.1)         | 4.2(1.8-17.9)*       | <0.0001 |
| IL-21         | 59.6(0.0-155.3)  | 19.5(0.0-118.9)   | 7.0(0.0-12.0)  | 71.6(0.0-305.2)        | 69.0(9.9-88.2)     | 0.0(0.0-4.8)         | 243.9(102.0-653.9)*  | 0.0001  |
| TNF- $\alpha$ | 5.1(1.9-7.1)     | 5.0(2.8-11.6)     | 0.2(0.0-2.0)   | 59.7(7.4-156.0)        | 8.3(6.2-19.0)      | 9.7(0.1-12.9)        | 15.6(10.2-174.5)*    | <0.0001 |
| IFN- $\gamma$ | 0.0(0.0-1.4)     | 0.0(0.0-2.7)      | 0.0(0.0-0.8)   | 4.1(2.6-10.6)*         | 2.1(1.0-3.1)       | 0.0(0.0-1.1)         | 2.1(0.6-7.6)         | 0.001   |
| Eotaxin       | 17.8(12.4-48.2)  | 14.3(5.6-32.1)    | 7.4(2.8-17.7)  | 112.7(76.5-303.5)*     | 9.7(7.6-11.0)      | 25.1(5.8-54.8)       | 49.1(28.3-107.6)     | 0.0001  |
| RANTES        | 1848(654-2686)   | 4355(756-6423)    | 3107(764-8058) | 2128(937-2590)         | 331(142-6902)      | 120(22-895)          | 3207(1171-6118)      | 0.002   |

**A**

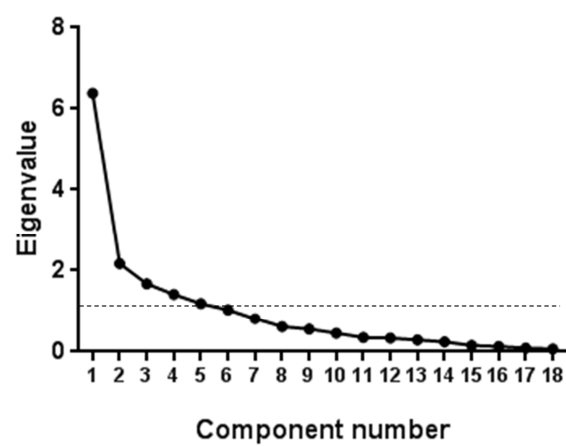

**B**

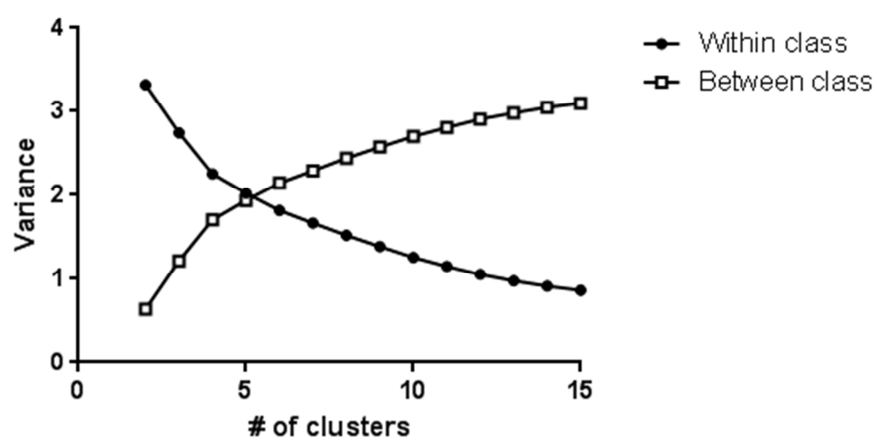

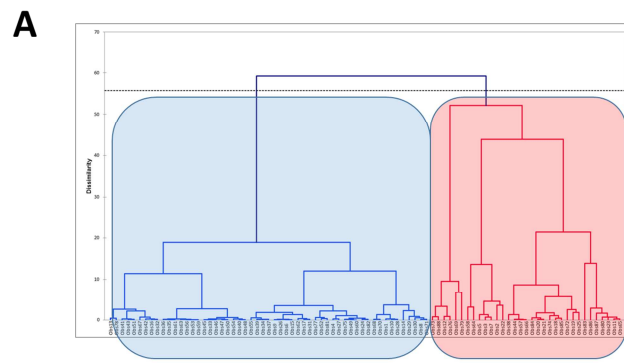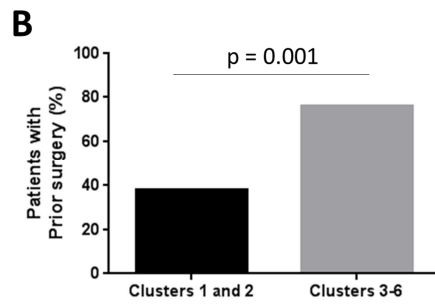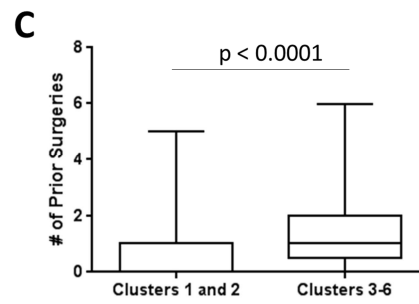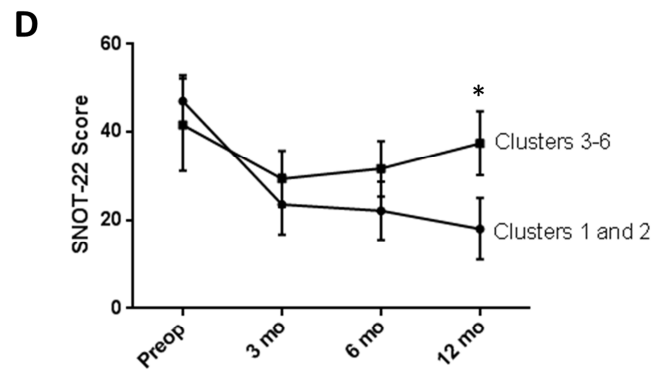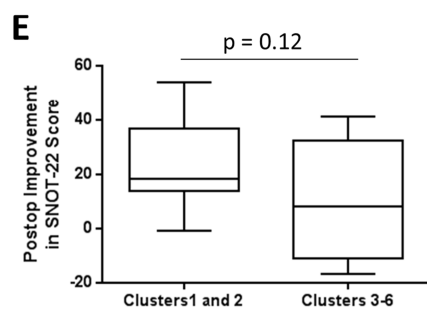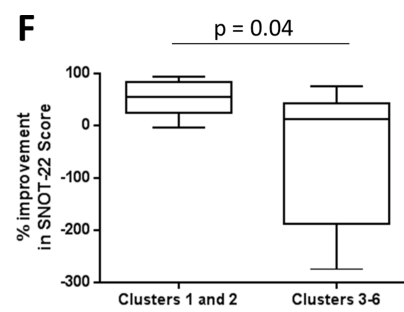

Supplement: NIHMS942708-supplement-supplement_1.pdf [file NIHMS942708-supplement-supplement_1.pdf]
